# Supplementary material for: Role of nuclear factor κB in multiple sclerosis and experimental autoimmune encephalomyelitis
Source: PubMed Central journal article supplement — Neural Regen Res. 2018 Sep;13(9):1507–15. doi: 10.4103/1673-5374.237109 (PMC6126134; doi:10.4103/1673-5374.237109), 2018-09
Supplement: NRR-13-1507_Suppl1.pdf [file NRR-13-1507_Suppl1.pdf]

## PEER-REVIEW REPORT 1

**Name of journal:** Neural Regeneration Research

**Manuscript NO:** NRR-D-18-00149

**Title:** Role of nuclear-factor  $\kappa$ B in multiple sclerosis and experimental autoimmune encephalomyelitis

**Reviewer's Name:** Manoj Kumar Jaiswal

**Reviewer's country:** USA

**Date sent for review:** 2018-03-09

**Date reviewed:** 2018-03-25

**Review time:** 16 Days

### COMMENTS TO AUTHORS

The present manuscript "NF- $\kappa$ B in multiple sclerosis " by Yuan Yue sought to suggest that transcription factor NF- $\kappa$ B is a major player in inflammatory diseases Multiple sclerosis (MS) by regulating inflammation and cell viability and important role in the development of MS. The topic is extremely important and timely. The material collected and discussed is relevant and up-to-date. The relationships between the two players - transcription factor NF- $\kappa$ B and MS as well as experimental autoimmune encephalomyelitis (EAE) - is discussed in the way suggested by the literature, and further new hypothesis or idea is suggested.
