# Supplementary material for: Role of nuclear factor κB in multiple sclerosis and experimental autoimmune encephalomyelitis
Source: PubMed Central journal article supplement — Neural Regen Res. 2018 Sep;13(9):1507–15. doi: 10.4103/1673-5374.237109 (PMC6126134; doi:10.4103/1673-5374.237109), 2018-09
Supplement: NRR-13-1507_Suppl2.pdf [file NRR-13-1507_Suppl2.pdf]

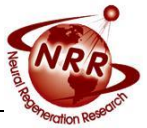

## PEER-REVIEW REPORT 2

**Name of journal:** Neural Regeneration Research

**Manuscript NO:** NRR-D-18-00149

**Title:** Role of nuclear-factor  $\kappa$ B in multiple sclerosis and experimental autoimmune encephalomyelitis

**Reviewer's Name:** Jiang Li

**Reviewer's country:** China

**Date sent for review:** 2018-03-09

**Date reviewed:** 2018-03-21

**Review time:** 12 Days

### COMMENTS TO AUTHORS

This manuscript is well written by the authors. But there are several things need to be correct:

1. In page 5 line 41: Should it be written as "The structure of transcription activation domain(TAD) is responsible for ....."?

2. As a review, the references should be the newer, but in the article, forty-three of these references are more than ten years old, some even more than 20 years, over forty percents of the total. I recommend to refer to the literature within ten years.
